# Supplementary material for: Gut Microbiota and Tacrolimus Dosing in Kidney Transplantation
Source: PLoS One. 2015 Mar 27;10(3):e0122399. doi: 10.1371/journal.pone.0122399 (PMC4376942; doi:10.1371/journal.pone.0122399)
Supplement: S1 Information — (XLSX) [file pone.0122399.s002.xlsx]

## Sheet: Clinical Tx Characteristics
Subject ID	Age (years)	Weight Day 0 (kg)	Weight Day 28 (Kg)	Gender	African American Race	Type of Transplantation	Induction Therapy	Maintenance - Tacrolimus and Mycophenolate	Corticosteroid Protocol	Preoperative Antibiotic Prophylaxis	Thrush Prophylaxis	CMV Prophylaxis	PCP Prophylaxis	Diltiazem Use	Antibiotics 1 month prior to transplantation	Tacrolimus Group	TacroTroughLevelDay7 (ng/mL)	TacroTroughLevelDay14 (ng/mL)	TacroTroughLevelDay21 (ng/mL)	TacroTroughLevelDay28 (ng/mL)	TacroDoseDay2 (mg/day)	TacroDoseDay7 (mg/day)	TacroDoseDay14 (mg/day)	TacroDoseDay21 (mg/day)	TacroDoseDay28 (mg/day)	TacroCumulativeDose1Month (mg/1 month)	NumberTacrolimusTroughsMeasured in First Month	Baseline ALT (IU/L)	Baseline Albumin (g/dL)	Hemoglobin Day 7 (g/dL)
1	45	87.2	88	Male	non African American	Living Donor Transplantation	Basiliximab	Tacrolimus and mycophenolate	Corticosteroid Maintenance - Prednisone	Cefazolin	Clotrimazole 10 mg PO BID	valganciclovir	atovaquone	no diltiazem	none	Dose Stable Group	13.3	7	8.7	10.6	4	3	3	3	2	80	9	37	3.3	10.5
3	63	90	95.3	Male	non African American	Living Donor Transplantation	Anti-thymocyte globulin therapy	Tacrolimus and mycophenolate	Corticosteriod Free	Cefazolin	Clotrimazole 10 mg PO BID	valganciclovir	trimethoprim/sulfamethoxazole	no diltiazem use	ampicillin	Dose Escalation Group	6.9	4.1	8.8	9.5	4	5	5	7	7	158	8	18	4.2	9.8
5	53	78.1	77.1	Female	non African American	Living Donor Transplantation	Anti-thymocyte globulin therapy	Tacrolimus and mycophenolate	Corticosteroid Maintenance - Prednisone	Cefazolin	Clotrimazole 10 mg PO BID	valganciclovir	trimethoprim/sulfamethoxazole	no diltiazem use	none	Dose Stable Group	7.3	8.4	8.7	10.4	4	4	2	2	1.5	68	9	18	3.9	11.9
6	65	51.5	52.1	Female	non African American	Deceased Donor Transplantation	Anti-thymocyte globulin therapy	Tacrolimus and mycophenolate	Corticosteriod Free	Cefazolin	Clotrimazole 10 mg PO BID	valganciclovir	trimethoprim/sulfamethoxazole	no diltiazem use	none	Dose Stable Group	8.9	11.1	7.7	12.5	4	5	4	4	4	120	9	22	4.7	10.1
7	62	87	84.8	Female	African American	Living Donor Transplantation	Anti-thymocyte globulin therapy	Tacrolimus and mycophenolate	Corticosteriod Free	Cefazolin	Clotrimazole 10 mg PO BID	valganciclovir	trimethoprim/sulfamethoxazole	no diltiazem use	none	Dose Stable Group	9.9	8.2	9.1	10.4	4	6	5	5	5	142	7	13	3.8	8.5
9	65	91.7	88.4	Male	non African American	Living Donor Transplantation	Anti-thymocyte globulin therapy	Tacrolimus and mycophenolate	Corticosteriod Free	Cefazolin	Clotrimazole 10 mg PO BID	acylclovir	trimethoprim/sulfamethoxazole	diltiazem use	unknown	Dose Escalation Group	2.7	5.4	8.3	7	3	8	10	11	11	256	12	14	3.6	8.6
11	67	85	84.5	Male	non African American	Deceased Donor Transplantation	Anti-thymocyte globulin therapy	Tacrolimus and mycophenolate	Corticosteriod Free	Vancomycin	Clotrimazole 10 mg PO BID	valganciclovir	trimethoprim/sulfamethoxazole	no diltiazem use	none	Dose Stable Group	14	13.9	12.4	7.5	4	5	3	2	2	98	8	15	3.8	9.8
12	72	68	66.8	Male	non African American	Deceased Donor Transplantation	Basiliximab	Tacrolimus and mycophenolate	Corticosteriod Free	Cefazolin	Clotrimazole 10 mg PO BID	valganciclovir	trimethoprim/sulfamethoxazole	no diltiazem use	none	Dose Stable Group	9	15.6	6.9	8.8	4	3	2	1	1	58	8	23	4.1	11.2
20	56	93.1	91.3	Female	non African American	Deceased Donor Transplantation	Anti-thymocyte globulin therapy	Tacrolimus and mycophenolate	Corticosteroid Maintenance - Prednisone	Cefazolin	Clotrimazole 10 mg PO BID	valganciclovir	trimethoprim/sulfamethoxazole	no diltiazem use	ampicillin	Dose Stable Group	15.5	13.1	7.2	7.2	4	5	4	3	3	103	6	16	3.4	12.1
21	53	83	81.9	Female	non African American	Living Donor Transplantation	Anti-thymocyte globulin therapy	Tacrolimus and mycophenolate	Corticosteriod Free	Cefazolin	Clotrimazole 10 mg PO BID	valganciclovir	trimethoprim/sulfamethoxazole	no diltiazem use	none	Dose Stable Group	9.6	11.7	8.6	9.1	4	5	4	4	4	118	7	17	3.7	11.1
22	60	77.6	77	Female	African American	Deceased Donor Transplantation	Anti-thymocyte globulin therapy	Tacrolimus and mycophenolate	Corticosteroid Maintenance - Prednisone	Cefazolin	Clotrimazole 10 mg PO BID	valganciclovir	trimethoprim/sulfamethoxazole	no diltiazem use	none	Dose Stable Group	11	6	9.9	12.8	4	2	2	2	2	65	7	14	3.3	10.3
23	31	88.6	83.2	Male	non African American	Deceased Donor Transplantation	Anti-thymocyte globulin therapy	Tacrolimus and mycophenolate	Corticosteriod Free	Cefazolin	Clotrimazole 10 mg PO BID	valganciclovir	trimethoprim/sulfamethoxazole	no diltiazem use	none	Dose Escalation Group	3.1	5.8	5	4.1	4	8	11	12	12	283	9	19	3.4	10.2
24	33	59.6	57.6	Female	non African American	Living Donor Transplantation	Anti-thymocyte globulin therapy	Tacrolimus and mycophenolate	Corticosteroid Maintenance - Prednisone	Cefazolin	Clotrimazole 10 mg PO BID	valganciclovir	trimethoprim/sulfamethoxazole	no diltiazem use	none	Dose Escalation Group	7.6	7.3	10.9	6.7	6	5	6	6	7	169	8	11	4	9.9
27	56	72.7	74.8	Male	non African American	Living Donor Transplantation	Anti-thymocyte globulin therapy	Tacrolimus and mycophenolate	Corticosteriod Free	Cefazolin	Clotrimazole 10 mg PO BID	acylclovir	trimethoprim/sulfamethoxazole	no diltiazem use	none	Dose Stable Group	6.5	10.5	8.6	7.2	4	6	6	5	5	148	9	44	4.3	10.3
28	59	67.1	66.1	Female	non African American	Deceased Donor Transplantation	Basiliximab	Tacrolimus and mycophenolate	Corticosteroid Maintenance - Prednisone	Vancomycin	Clotrimazole 10 mg PO BID	valganciclovir	dapsone	no diltiazem use	none	Dose Stable Group	7.1	4	9.1	7.7	4	3	5	5	5	126	10	22	2.8	8.1
30	25	75.9	69.7	Male	non African American	Deceased Donor Transplantation	Anti-thymocyte globulin therapy	Tacrolimus and mycophenolate	Corticosteriod Free	Cefazolin	Clotrimazole 10 mg PO BID	valganciclovir	trimethoprim/sulfamethoxazole	no diltiazem use	none	Dose Escalation Group	1.9	6.4	2.9	9.4	4	8	9	11	11	254	7	36	3.9	8.3
31	66	52	52.4	Female	non African American	Living Donor Transplantation	Anti-thymocyte globulin therapy	Tacrolimus and mycophenolate	Corticosteriod Free	Vancomycin	Clotrimazole 10 mg PO BID	valganciclovir	dapsone	diltiazem use	clindamycin	Dose Stable Group	12.4	8.3	8.9	8.8	1	3	2	2	2	54	9	15	2.6	10.9
32	63	52	60	Female	non African American	Living Donor Transplantation	Anti-thymocyte globulin therapy	Tacrolimus and mycophenolate	Corticosteroid Maintenance - Prednisone	Cefazolin	Clotrimazole 10 mg PO BID	valganciclovir	trimethoprim/sulfamethoxazole	no diltiazem use	none	Dose Stable Group	6.4	6.1	5.4	5.2	4	3	3	3	5	96	15	13	3.2	11.4
33	46	83.6	82.5	Female	African American	Living Donor Transplantation	Anti-thymocyte globulin therapy	Tacrolimus and mycophenolate	Corticosteriod Free	Cefazolin	Clotrimazole 10 mg PO BID	valganciclovir	trimethoprim/sulfamethoxazole	no diltiazem use	none	Dose Stable Group	5	9.4	10.3	8	4	5	6	5	4	131	9	12	4.1	8.3

## Sheet: Fecal Specimen Characteristics
Stool Specimen ID	Subject ID	Post Transplant Day Specimen Obtained
01A	1	-0
01B	1	4
01C	1	11
03B	3	4
03C	3	14
03D	3	28
05A	5	3
05B	5	12
05C	5	27
06A	6	3
06B	6	11
07A	7	3
07B	7	12
09A	9	-2
09B	9	3
09D	9	15
09E	9	25
11B	11	5
11C	11	11
11D	11	27
12A	12	3
12B	12	8
12C	12	18
20A	20	4
20B	20	14
20C	20	30
21A	21	2
21B	21	7
22B	22	2
22C	22	14
22D	22	30
23A	23	2
23C	23	5
23D	23	22
24A	24	2
24B	24	14
27A	27	-1
27B	27	2
27C	27	11
27D	27	21
28A	28	3
28B	28	17
30A	30	2
30B	30	12
30C	30	27
31A	31	-7
31B	31	2
31C	31	7
31D	31	19
32A	32	-0
32B	32	3
32C	32	8
32D	32	14
33A	33	3
33B	33	6
33C	33	13
